1 Simultaneous CO<sub>2</sub> and CO methanation using microbes

2

3 Kohlmayer Matthias<sup>a,b,c,#</sup>, Huber Robert<sup>c,d</sup>, Brotsack Raimund<sup>b,c</sup>, Mayer Wolfgang<sup>e</sup>

4 <sup>a</sup>Technical University of Munich, Munich, Germany

5 <sup>b</sup>Deggendorf Institute of Technology, Deggendorf, Germany

6 <sup>c</sup>MicroPyros GmbH, Straubing, Germany

7 <sup>d</sup>Municipal vocational school for biological-technical assistants Straubing, Straubing, Germany

8 <sup>e</sup>University of Applied Sciences Kempten, Kempten, Germany

9

10 #Address correspondence to Kohlmayer Matthias, [matthias.kohlmayer@tum.de](mailto:matthias.kohlmayer@tum.de).

11 **ABSTRACT**

12 In this study, we developed a method for simultaneous bio-methanation of CO<sub>2</sub> and CO with H<sub>2</sub>  
13 in a single bioreactor using a combination of carboxydrotrophic bacteria and methanogenic  
14 archaea for industrial applications. Methanogenic archaea generally use H<sub>2</sub> and CO<sub>2</sub> to produce  
15 methane, whereas very few methanogenic archaea methanize CO, and these grow slowly and  
16 consequently produce low reactant gas turnover rates. Thus, to achieve fast and simultaneous  
17 transformation of CO and CO<sub>2</sub>, we identified a combination of carboxydrotrophic and  
18 hydrogenogenic bacteria and methanogenic archaea that can produce H<sub>2</sub> and CO<sub>2</sub> from CO, and  
19 then methanize CO<sub>2</sub> and H<sub>2</sub>. The present screening experiments identified carboxydrotrophic  
20 bacteria and methanogenic archaea that can cohabitate at the same thermophilic temperature and  
21 pH ranges and in the same growth medium. In these experiments, combinations of  
22 *Carboxydocella thermautotrophica* (DSM 12326), *Carboxydocella sporoproducens* (DSM  
23 16521), and three thermophilic rod-shaped methanogenic archaeal cultures from MicroPyros  
24 GmbH formed unique microbial co-cultures that transformed CO<sub>2</sub>, H<sub>2</sub>, and CO to methane. The  
25 successful combination of these microbes could be used to gasify biowastes, such as sewage  
26 sludge, as alternative sources of hydrogen for microbial power-to-gas processes. Accordingly,  
27 gasification under these conditions produced H<sub>2</sub>-rich gas containing CO<sub>2</sub> and CO, theoretically  
28 allowing various types of biowastes to be converted to biomethane, which is CO<sub>2</sub>-neutral,  
29 storable, and widely applicable as an energy source.

30

31 **IMPORTANCE:**

32 In this study, we hypothesized that the simultaneous bio-methanation of CO<sub>2</sub> and CO with H<sub>2</sub> in a  
33 single bioreactor can support the Power-to-Gas technology, a storage technology for renewable

34 energies. We formed a novel co-culture tool that efficiently achieved the fast and simultaneous  
35 transformation of CO and CO<sub>2</sub>. That novel co-culture consists of *Caroxydocella*  
36 *thermautotrophica* (DSM 12326), *C. sporoproducens* (DSM 16521), and three thermophilic rod-  
37 shaped methanogenic archaeal cultures from MicroPyros GmbH.

## 38 **Introduction**

39

40 We hypothesized that the efficient catalysis of the methanation of CO<sub>2</sub> and CO in a single  
41 bioreactor can aid in promoting the expansion of renewable energy sources to slow climate  
42 change. For the efficient catalysis, we have developed a combination of carboxydrotrophic  
43 bacteria and methanogenic archaea.

44 Power-to-Gas (PtG) storage technologies have been developed to support the use of renewable  
45 energies, and these use electrical power from renewable sources to split water and generate  
46 hydrogen and oxygen. Hydrogen from such hydrolysis reactions can be stored as methane  
47 following reactions with CO<sub>2</sub> as follows:  $4 \text{H}_2 + \text{CO}_2 \rightarrow \text{CH}_4 + 2 \text{H}_2\text{O}$ . Hence, catalysis of such  
48 reactions by methanogenic archaea will constitute a microbial PtG technology.

49 The workload and profitability of PtG technologies can be increased using alternative sources of  
50 hydrogen when electrical power for hydrogen production is expensive. To this end, gasification  
51 of sewerage sludge may provide an adjustable, ecological, and economically rational alternative  
52 H<sub>2</sub> source for microbial PtG processes (1), (2). The ensuing gasification produces H<sub>2</sub>-rich gas that  
53 also contains CO<sub>2</sub> and CO, and could be used directly as a gas mixture for the PtG processes,  
54 pending on the methanation of CO.

55 In contrast with chemical-catalyzed synthesis of methane from H<sub>2</sub> and CO<sub>2</sub> using the so-called  
56 Sabatier process, microorganism biocatalysts can adapt to gas pollution, are robust to fluctuations  
57 of gas contents, and can work at lower temperatures and pressures (3). Multiple methanogenic  
58 archaea have been shown to methanize CO<sub>2</sub> and H<sub>2</sub>, although very few reportedly methanize CO  
59 (4), (5), (6), (7), and these grow slowly and produce low rates of reactant gas turnover (8).  
60 However, efficient CO-oxidizing, H<sub>2</sub>-producing bacteria have been identified, and these use CO  
61 as their only source of carbon and energy (9).

62 Klasson *et al.* (10) previously reported the use of a single co-culture comprising *Rhodospirillum*  
63 *rubrum* to convert CO and H<sub>2</sub> to methane and *Methanobacterium*  
64 *formicicum* and *Methanosarcina barkeri* to convert H<sub>2</sub> and CO<sub>2</sub> to methane at 34°C. Herein, we  
65 identified microbes that could simultaneously methanize CO<sub>2</sub>, H<sub>2</sub>, and CO at thermophilic growth  
66 temperatures. We then devised a novel combination of CO-utilizing and H<sub>2</sub>-producing bacteria  
67 (CO + H<sub>2</sub>O → CO<sub>2</sub> + H<sub>2</sub>) with methanogenic archaea (CO<sub>2</sub> + 4 H<sub>2</sub> → CH<sub>4</sub> + 2 H<sub>2</sub>O) and showed  
68 optimal growth at around 63°C.

69 Our data demonstrate a highly efficient microbial co-culture that transforms CO<sub>2</sub>, H<sub>2</sub>, and CO to  
70 methane. This co-culture comprised a combination of *Carboxydocella thermautotrophica* (DSM  
71 12326), *Carboxydocella sporoproducens* (DSM 16521), and three methanogenic archaea cultures  
72 from MicroPyros GmbH. The present innovation may provide the basis for gasification of  
73 sewage sludge as an alternative source of hydrogen for industrial scale microbial PtG processes.

## 74 **Materials and Methods**

75 Based on the methods reported by Hofbauer *et al.* (11), we used the synthetic steam gasifier and  
76 synthetic air gasifier gas compositions shown in Table 1. Gases were purchased from Tyczka  
77 Industrie-Gase of Mannheim, Germany.

78 The present co-cultures were established as combinations of *Carboxydocella thermautotrophica*  
79 (DSM 12326; 12), *Carboxydocella sporoproducens* (DSM 16521; 13; so-called Carbos) from  
80 Deutsche Sammlung für Mikroorganismen und Zellkulturen of Brunswick, Germany, and a cell  
81 mixture of three thermophilic rod-shaped methanogenic archaeal cultures (TRMC) that were  
82 kindly supplied by MicroPyros GmbH of Straubing, Germany. TRMC are autotrophic isolates  
83 from the biogas plant of Zweckverband Abfallwirtschaft of Straubing, Germany and were  
84 selected in screens for reproducible growth in newly designed medium (see below) with synthetic  
85 steam gasifier gas and synthetic air gasifier gas. The present isolates showed the best and most  
86 reproducible growth among all strains tested and were selected from the MicroPyros culture  
87 collection. *Carboxydocella sporoproducens* cells grow more slowly than *Carboxydocella*  
88 *thermautotrophica* cells but can form stable spores that survive periods of CO  
89 deprivation (12), (13). To ensure sustained supply, cultures were transferred into fresh media  
90 weekly (5% inoculation) and were incubated at 63°C for 24 h. All experiments were performed in  
91 triplicate for at least five transfers.

92 Growth media were prepared as described by Zhao *et al.* (14), except that the expensive vitamin  
93 and yeast extract supplements were omitted for future industrial scale-up. The final media  
94 contained (g/L) KCl (0.33), MgCl<sub>2</sub>×6H<sub>2</sub>O (0.102), CaCl<sub>2</sub>×2H<sub>2</sub>O (0.015), NH<sub>4</sub>Cl (0.33), K<sub>2</sub>HPO<sub>4</sub>  
95 (0.14), and NaHCO<sub>3</sub> (0.42) in demineralized water. A trace element solution (10 mL/L) and a

96 selenite-tungstate solution (0.1 mL/L) were added as described for DSMZ medium 14 and DSMZ  
97 medium 385.

98 Oxygen was expelled from media solutions using the argon method described by Hungate (15)  
99 with minor modifications. Subsequently, 0.7 g/L of Na<sub>2</sub>S×9H<sub>2</sub>O was added, and media were  
100 introduced to anaerobic chambers and were dispensed into 28 mL serum tubes at 5 mL per tube.  
101 Tubes were then sealed with rubber stoppers and were pressurized to 3 bar absolute using the  
102 desired gas phase. Gas phases in glass tubes were then exchanged by degassing and gassing three  
103 times. Pressurized tubes were then autoclaved at 121°C for 15 min (15), (16) and the pH of the  
104 autoclaved medium was about 6.5. Culture tubes were incubated almost horizontally to maximize  
105 contact areas of gas and liquid phases, and gases entered liquid phases containing  
106 microorganisms solely by diffusion. Samples of cultures were taken using syringes (Omnifix-  
107 F®), and numbers of cells were counted using fluorescence microscopy (Olympus BX53F) with  
108 a Thoma counting chamber. Numbers of cells in TRMC were determined by counting fluorescent  
109 cells, and pH was determined using pH sticks (pH-Fix; 4.5–10.0, Roth). Pressure levels in culture  
110 tubes were determined using a portable WAL 0–4 bar absolute membrane pressure unit (Wal  
111 Mess- und Regelsysteme GmbH of Oldenburg, Germany).

112 H<sub>2</sub>, CO, CO<sub>2</sub>, CH<sub>4</sub>, and N<sub>2</sub> contents were quantified using a Thermo Fisher Scientific Trace 1310  
113 gas chromatograph with a thermal conductivity detector. In these determinations, 400 µL aliquots  
114 of gas were taken from the headspaces of culture tubes and were added to a packed Supelco  
115 Carboxen-1000 column (Gas Syringe A-2, Macherey-Nagel of Düren, Germany). The column  
116 was then heated to 108°C and maintained at this temperature for 6.25 min, followed by heating to  
117 177°C at 120°C/min and maintenance at this temperature for 3.2 min. Finally, the column was  
118 heated at 120°C/min to 222°C and was maintained at this temperature for 4.6 min. Argon was

119 used as the carrier gas at a flow rate of 11 mL/min. The injector and detector were adjusted to  
120 125°C and 235°C, respectively. Measured GC values were standardized to 100%. Finally,  
121 methane production rates (MPR) were calculated as ml of CH<sub>4</sub> produced/(mL medium \*h).

## 122 **Results**

### 123 **Co-culture**

124 *Carboxydocella thermautotrophica*, *Carboxydocella sporoprducens* (Carbos), and cells from the  
125 three thermophilic rod-shaped methanogenic archaeal isolates (TRMC) proliferated well together  
126 in the newly designed medium without vitamin solution or yeast extract and under the growth  
127 conditions are presented in Table 2 (11), (12).

128

129

### 130 **Metabolic properties of TRMC isolates**

131 Mixtures of the three methanogenic archaeal isolates methanated CO<sub>2</sub> and consumed H<sub>2</sub> from the  
132 gas phase in the volumes shown in Fig. 1. However, CO conversion was not observed with either  
133 steam gasifier or air gasifier gas (Fig. 1).

134

135 Fig. 1: Gas compositions at 0 and 71.3-h incubation of TMRC in air gasifier gas

136

## 137 **Growth experiments with Carbos and TRMC**

138 In initial experiments with combinations of Carbos and TRMC, microscope analyses showed the  
139 presence of fluorescent methanogenic archaea and the morphologically shorter non-fluorescent  
140 carboxydrotrophic, hydrogenogenic bacteria growing in co-culture (Fig. 2), with an estimated  
141 TRMC to Carbos ratio of about 2:1 (Fig. 2).

142  
143 Fig. 2: Co-culture of methanogenic archaea (TRMC; blue-colored rods) with carboxydrotrophic  
144 bacteria (Carbos; black-colored rods) in steam gasifier gas after 96 h incubation at 63°C

145  
146 **Consumption of steam gasifier gas by co-cultures**

147 Figure 3 shows simultaneous decreases in H<sub>2</sub> and CO concentrations and concomitant increases  
148 in CH<sub>4</sub> contents of the gas phase. In these experiments, calculated maximum methane  
149 concentrations in the headspace were achieved within 96 h, based on reaction equations CO +  
150 H<sub>2</sub>O → H<sub>2</sub> + CO<sub>2</sub> [1] and CO<sub>2</sub> + 4 H<sub>2</sub> → CH<sub>4</sub> + 2 H<sub>2</sub>O [2]. Moreover, CO<sub>2</sub> concentrations were  
151 increased immediately and then remained approximately constant, and pressure (p) profiles (p  
152 actual / p start) dropped during methanation to about 44% of the initial pressure.

153  
154 Fig. 3: Changes in gas compositions and pressure during incubation in steam gasifier gas; error  
155 bars indicate standard deviations of three measurements

156



157 Initial hydrogen concentrations were 50% and dropped to 0.5% within 72 h, and CO  
158 concentrations decreased from 20% to 3% over the same time. Concomitantly, methane  
159 concentrations increased from 10% to 53%, and after 96 h incubation, H<sub>2</sub> concentrations were  
160 0%, CO concentrations were 2%, and methane concentrations were 55% of the entire volume.  
161 Moreover, increases in methane concentrations increased by about 1.0 vol%/h between 24 and 48  
162 h, corresponding with a methane production rate of 0.03 mL/(mL\*h).

163 The maximum possible methane concentration in the steam gasifier gas phase following  
164 complete H<sub>2</sub> and CO methanation according to equations [1] and [2] was 55 vol%, and the total  
165 methane production rate from 10 vol% to 55 vol% methane over the entire 96 h incubation time  
166 was 0.02 mL/(mL\*h).

167 During growth experiments in steam gasifier gas, numbers of cells in Carbos and TRMC  
168 increased during the first period of methanation, and then decreased and remained stable at about  
169  $1 \times 10^8$  cells/mL (Fig. 4).

170 Fig. 4: Changes in cell numbers over the incubation period in steam gasifier gas at 63°C; standard  
171 deviations of three measurements are indicated by error bars

## 172 **Consumption of air gasifier gas by co-cultures**

173  
174 H<sub>2</sub> and CO contents decreased with increases in CH<sub>4</sub> concentrations in the gas phase (Figure 5),  
175 and the calculated maximum methane concentration in the headspace was achieved within 72 h.  
176 Simultaneously, pressure profiles in the gas phase of the glass tubes ( $p_{\text{actual}} / p_{\text{start}}$ ) dropped to  
177 about 69% of the initial pressure during methanation. In accordance, hydrogen concentrations in  
178 air gasifier gas dropped from 15% to 1.5% over 48 h. Concomitantly, CO concentrations

179 decreased from 20% to 3%, and methane concentrations increased from 10% to 21%. After 96 h,  
180 the hydrogen concentration was 0%, the CO concentration was 1%, and the methane  
181 concentration was 22% of the total volume, and this concentration was maximal in air gasifier  
182 gas following complete H<sub>2</sub> and CO methanation, according to equations [1] and [2]. Moreover, in  
183 calculations of MPR, methane concentrations increased by 0.22 vol%/h between 24 and 48 h  
184 incubation, corresponding with a production rate of 0.01 mL/(mL\*h). Similarly, the total methane  
185 production rate from 10 vol% methane at 0 h to 22 vol% at 72 h was 0.01 mL/(mL\*h).

186

187 Fig. 5: Changes in gas composition and pressure over the incubation period in air gasifier gas;  
188 standard deviations of three measurements are indicated by error bars

189

190 Growth experiments in air gasifier gas showed initial increases in cell numbers in Carbos and  
191 TRMC, followed by decreases to  $0.5 \times 10^8$ /mL and  $0.8 \times 10^8$ /mL, respectively (Fig. 6).

192

193 Fig. 6: Changes cell numbers over the incubation period in air gasifier gas; standard deviations of  
194 three measurements are indicated by error bars

195

## 196 **Discussion**

197 In the present novel combination cultures of thermophilic methanogenic archaea and  
198 thermophilic carboxydophilic and hydrogenogenic bacteria, growth of all three organisms in

199 synthetic steam gasifier gas and in synthetic air gasifier gas was observed, and CO, CO<sub>2</sub>, and H<sub>2</sub>  
200 were converted into methane. In addition, the ensuing increases in methane concentrations  
201 corresponded with the stoichiometric ratios indicated by the equations  $\text{CO} + \text{H}_2\text{O} \rightarrow \text{H}_2 + \text{CO}_2$   
202 and  $\text{CO}_2 + 4 \text{H}_2 \rightarrow \text{CH}_4 + 2 \text{H}_2\text{O}$ .

203 Consistent with kinetic expectations, methane production slowed with decreasing reactant gas  
204 concentrations and lower pressures in culture tubes, reflecting decreased substrate gas  
205 availability. However, in air gasifier gas, methanation proceeded more slowly due to lower  
206 hydrogen partial pressures compared with those in steam gasifier gas. Klasson *et al.* previously  
207 showed simultaneous conversion of the gases CO and H<sub>2</sub> by *Rhodospirillum rubrum* and H<sub>2</sub> and  
208 CO<sub>2</sub> by *Methanobacterium formicicum* and *Methanosarcina barkeri* in growing co-cultures at  
209 34°C. In their study, *R. rubrum* growth was dependent on the presence of tungsten, light, and a  
210 carbon source other than CO, such as sugars, acetate, or yeast extract, and vitamin supplements  
211 were also provided (10), (17). In contrast, the present unique microbial combination grew  
212 optimally at 63°C and remained viable in the absence of light and expensive vitamin supplements  
213 and carbon sources, thus increasing the convenience and cost-effectiveness of large-scale  
214 cultures. Moreover, in the study by Klasson *et al.*, methane yields from H<sub>2</sub> were 83% of the  
215 theoretical maximal yield (10), whereas we achieved 100% of theoretical maximal methane  
216 concentrations in the gas phase using synthetic steam and air gasifier gases. As a final advantage,  
217 the present co-culture system with spore-forming *Carboxydocella sporoproducens* was robust to  
218 periods of CO deficiency.

219 In summary, we demonstrated the use of a novel co-culture tool that efficiently allows the use of  
220 biowastes as sources of carbon and energy using gasification followed by biological methanation.  
221 This novel technology could also be applied to other CO<sub>2</sub>, H<sub>2</sub>, and CO-containing gases, such as

222 exhaust gases from steel production, allowing use as raw materials for the production of CO<sub>2</sub>-  
223 neutral methane in industrial processes (18).

## 224 **Acknowledgments**

225 We thank Dr. Jürgen Pettrak, Barbora Hemauer, Alexandra Fischer, and Maria Schubmann for  
226 their support in the lab and thank the whole team of the MicroPyros GmbH for fruitful  
227 discussions.

228 We also thank the SER Stadtentwässerung and Straßenreinigung Straubing for the permission to  
229 use their laboratory.

230 This work was supported by the TUM Applied Technology Forum Scholarship, so thank you,  
231 Christiane Hamacher.

## 232 **References**

233 1. Ren J, Fedele A, Mason M, Manzardo A, Scipioni A. 2013. Fuzzy Multi-actor Multi-criteria  
234 Decision Making for sustainability assessment of biomass-based technologies for hydrogen  
235 production. *Int J Hydrog Energy* 38:9111-9120.

236 2. Redaktion Onetz OM-DN. Interview mit Prof. Dr. rer nat. Andreas Hornung: Biobatterie  
237 wandelt Energie in biogene ...: Biobatterie aus der Oberpfalz. *onetzde*.

238 3. Bär K, Mörs F, Götz M, Graf F. 2015. Vergleich der biologischen und katalytischen  
239 Methanisierung für den Einsatz bei PtG-Konzepten. *gwf - GasErdgas* 156:466-473.

240 4. Daniels L, Fuchs G, Thauer RK, Zeikus JG. 1977. Carbon monoxide oxidation by  
241 methanogenic bacteria. *J Bacteriol* 132:118-126.

- 242 5. Liu Y, Whitman WB. 2008. Metabolic, phylogenetic, and ecological diversity of the  
243 methanogenic archaea. *Ann N Y Acad Sci* 1125:171-189.
- 244 6. Ferry JG. 2010. CO in methanogenesis. *Ann Microbiol* 60:1-12.
- 245 7. Diender M, Stams AJM, Sousa DZ. 2015. Pathways and bioenergetics of anaerobic carbon  
246 monoxide fermentation. *Front Microbiol* 6:1275.
- 247 8. Schwede S, Bruchmann F, Thorin E, Gerber M. 2017. Biological syngas methanation via  
248 immobilized methanogenic archaea on biochar. *Energy Procedia* 105:823-829.
- 249 9. Tiquia-Arashiro SM. 2014. CO-oxidizing microorganisms, p 11-28. *In Thermophilic*  
250 *carboxydrotrophs and their applications in biotechnology*. Springer, Cham.
- 251 10. Klasson KT, Cowger JP, Ko CW, Vega JL, Clausen EC, Gaddy JL. 1990. Methane  
252 production from synthesis gas using a mixed culture of *R. rubrum*, *M. barkeri*, and *M. formicicum*.  
253 *Appl Biochem Biotechnol* 24-25:317-328.
- 254 11. Hofbauer H, Kaltschmitt M, Keil F, Neuling U, Wagner H. 2016. Vergasung in der  
255 Gasatmosphäre, p 1059-1182. *In Energie aus Biomasse*. Springer Vieweg, Berlin, Heidelberg.
- 256 12. Sokolova TG, Kostrikina NA, Chernyh NA, Tourova TP, Kolganova TV, Bonch-  
257 Osmolovskaya EA. 2002. *Carboxydocella thermautotrophica* gen. nov., sp. nov., a novel  
258 anaerobic, CO-utilizing thermophile from a Kamchatkan hot spring. *Int J Syst Evol Microbiol*  
259 52:1961-1967.
- 260 13. Slepova TV, Sokolova TG, Lysenko AM, Tourova TP, Kolganova TV, Kamzolkina OV,  
261 Karpov GA, Bonch-Osmolovskaya EA. 2006. *Carboxydocella sporoproducens* sp. nov., a novel

262 anaerobic CO-utilizing/H<sub>2</sub>-producing thermophilic bacterium from a Kamchatka hot spring. *Int J*  
263 *Syst Evol Microbiol* 56:797-800.

264 14. Zhao Y, Cimpoia R, Liu Z, Guiot SR. 2011. Orthogonal optimization of Carboxydothemus  
265 hydrogenoformans culture medium for hydrogen production from carbon monoxide by biological  
266 water-gas shift reaction. *Int J Hydrog Energy* 36:10655-10665.

267 15. Hungate RE. 1969. Chapter IV: A roll tube method for cultivation of strict anaerobes, p 117-  
268 132. *In* Norris JR, Ribbons DW (eds), *Methods in microbiology*. Academic Press.

269 16. Wolfe RS. 1971. Microbial formation of methane, p 107-146. *In* Rose AH, Wilkinson JF  
270 (eds), *Advances in microbial physiology*. Academic Press.

271 17. Klasson KT, Ackerson MD, Clausen EC, Gaddy JL. 1992. Bioconversion of synthesis gas  
272 into liquid or gaseous fuels. *Enzyme Microb Technol* 14:602-608.

273 18. Ahrens R. 2015. ThyssenKrupp sucht die große Lösung VDI Nachrichten Nr. 10/2015.

274

## 275 **Figure Legends**

276 Fig. 1: Gas compositions at 0 and 71.3-h incubation of TMRC in air gasifier gas

277 Fig. 2: Co-culture of methanogenic archaea (TRMC; blue-colored rods) with carboxydophilic  
278 bacteria (Carbos; black-colored rods) in steam gasifier gas after 96 h incubation at 63°C

279 Fig. 3: Changes in gas compositions and pressure during incubation in steam gasifier gas; error  
280 bars indicate standard deviations of three measurements

281 Fig. 4: Changes in cell numbers over the incubation period in steam gasifier gas at 63°C; standard  
282 deviations of three measurements are indicated by error bars

283 Fig. 5: Changes in gas composition and pressure over the incubation period in air gasifier gas;  
284 standard deviations of three measurements are indicated by error bars

285 Fig. 6: Changes cell numbers over the incubation period in air gasifier gas; standard deviations of  
286 three measurements are indicated by error bars

287

*Table 1 Gas concentrations of steam gasifier and air gasifier gases*

|                 | Steam gasifier gas [vol%] | Air gasifier gas [vol%] |
|-----------------|---------------------------|-------------------------|
| H <sub>2</sub>  | 50                        | 15                      |
| CO              | 20                        | 20                      |
| CO <sub>2</sub> | 20                        | 20                      |
| CH <sub>4</sub> | 10                        | 10                      |
| N <sub>2</sub>  | 0                         | 35                      |



Table 2 Growth conditions

| Growth conditions  | <i>Carboxydocella thermautotrophica</i><br>(Range; Optimum)           | <i>Carboxydocella sporoproducens</i><br>(Range; Optimum)              | TRMC (Culture Conditions: MicroPyros)                                     | Conditions used for the co-culture (This study) |
|--------------------|-----------------------------------------------------------------------|-----------------------------------------------------------------------|---------------------------------------------------------------------------|-------------------------------------------------|
| T [°C]             | 40–68; 58                                                             | 50–70; 60                                                             | 63                                                                        | 63                                              |
| pH                 | 6.5–7.6; 7                                                            | 6.2–8.0; 6.8                                                          | 6.5                                                                       | 6.5                                             |
| Metabolic reaction | $\text{CO} + \text{H}_2\text{O} \rightarrow \text{CO}_2 + \text{H}_2$ | $\text{CO} + \text{H}_2\text{O} \rightarrow \text{CO}_2 + \text{H}_2$ | $\text{CO}_2 + 4\text{H}_2 \rightarrow \text{CH}_4 + 2\text{H}_2\text{O}$ | This study                                      |

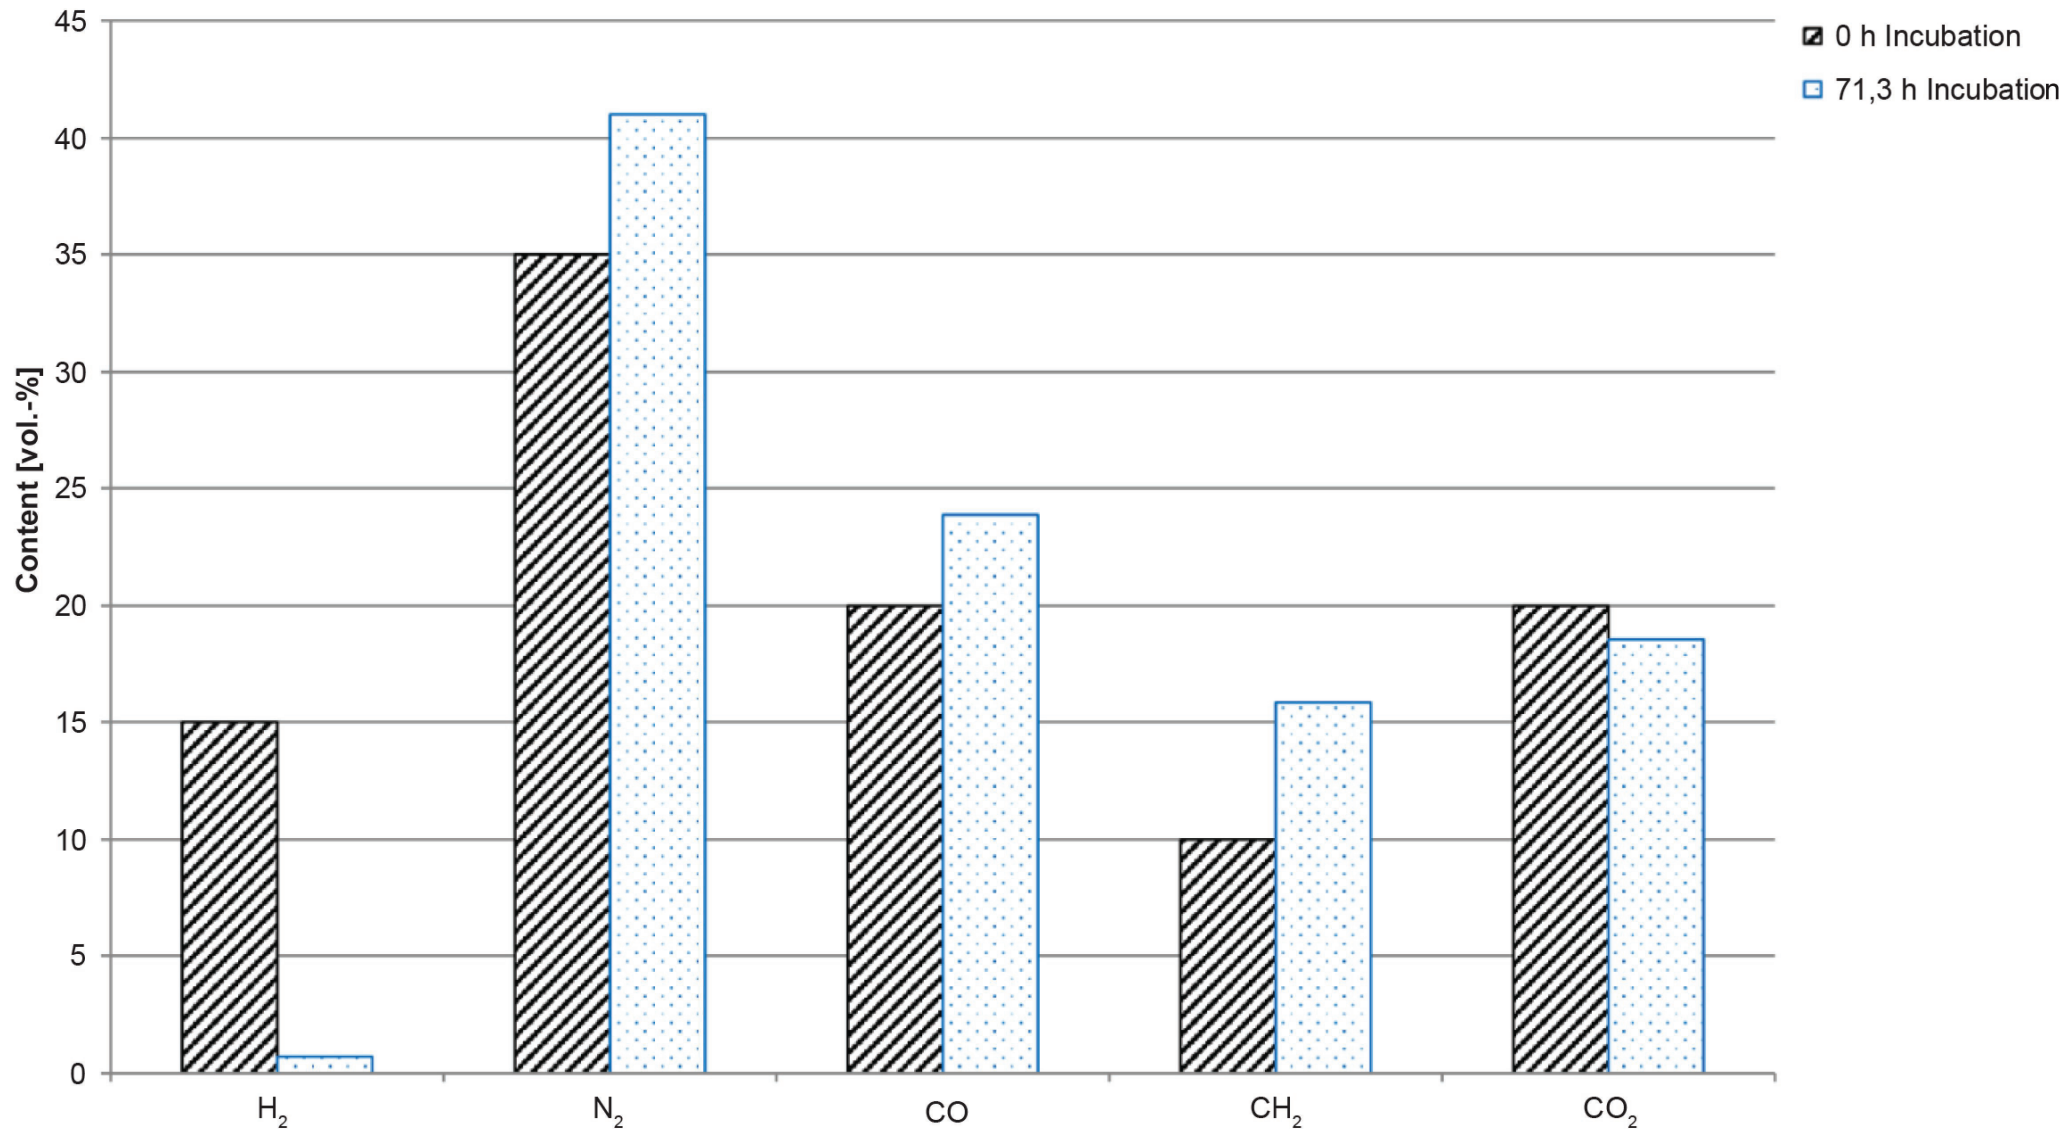

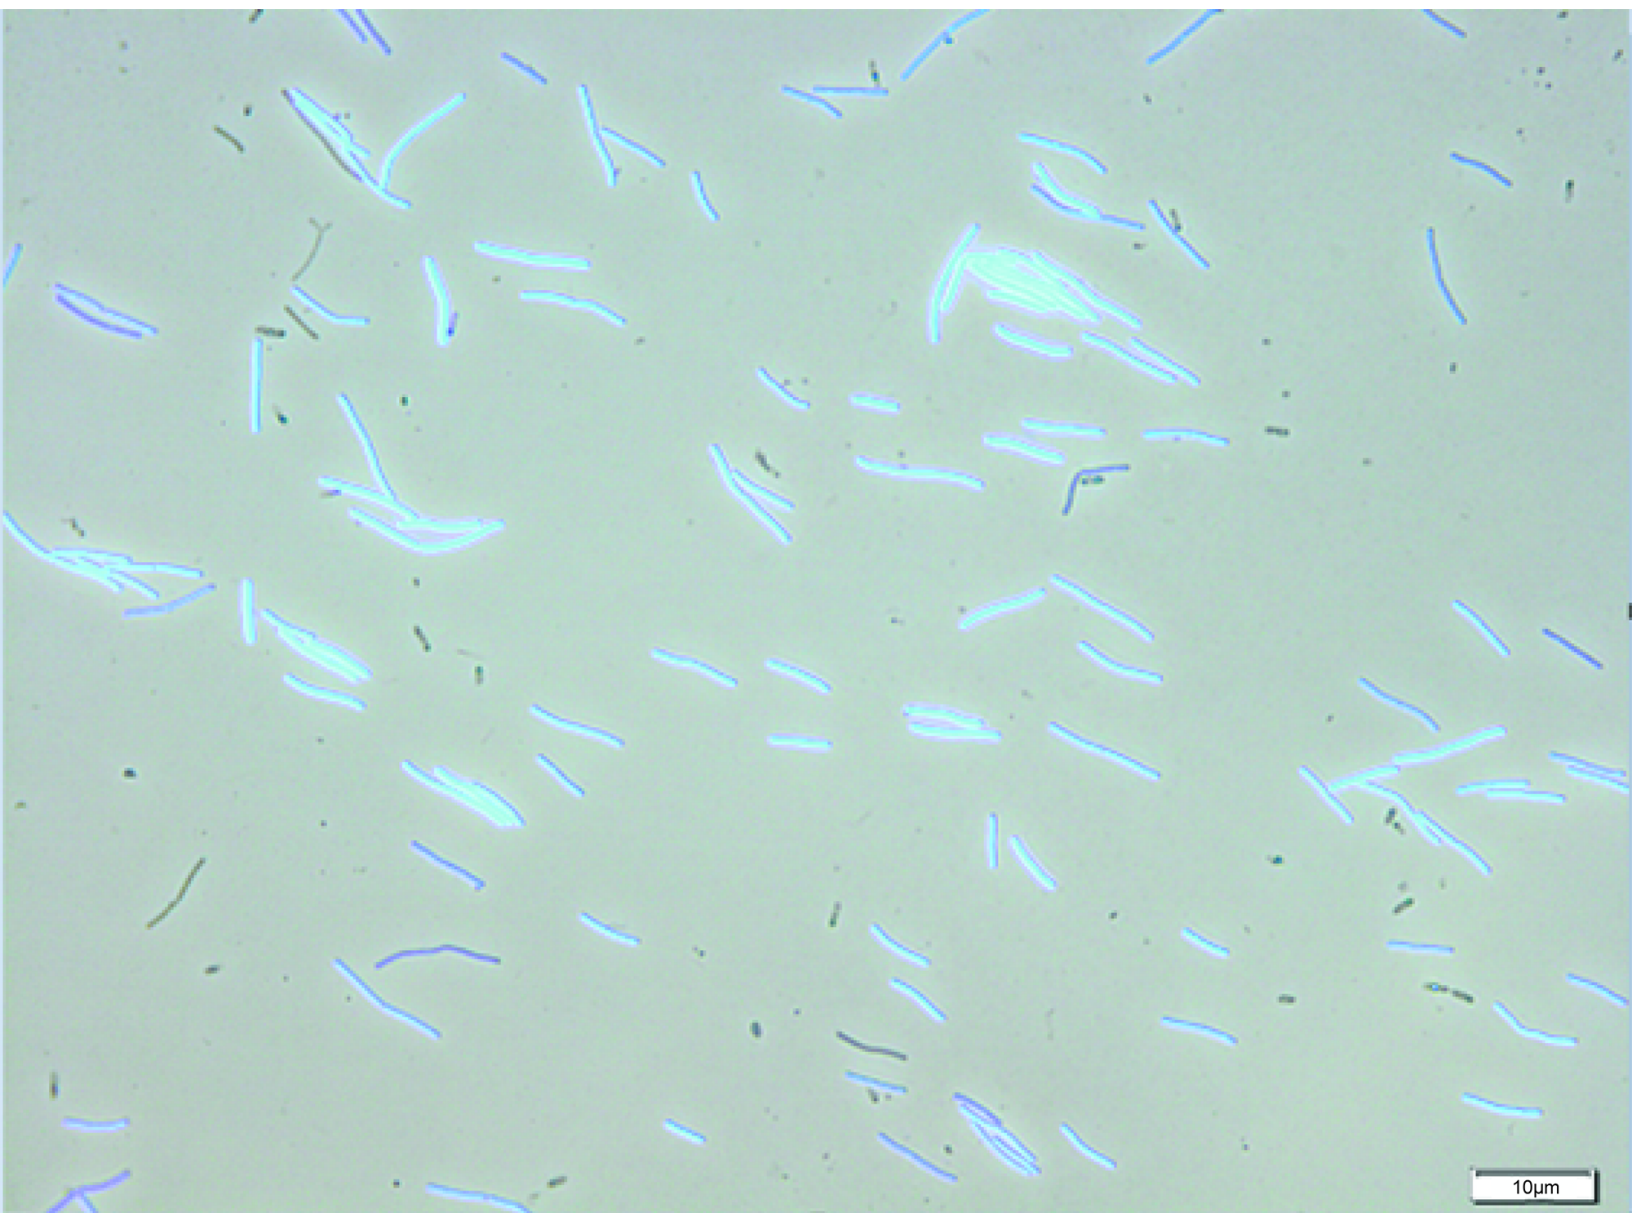

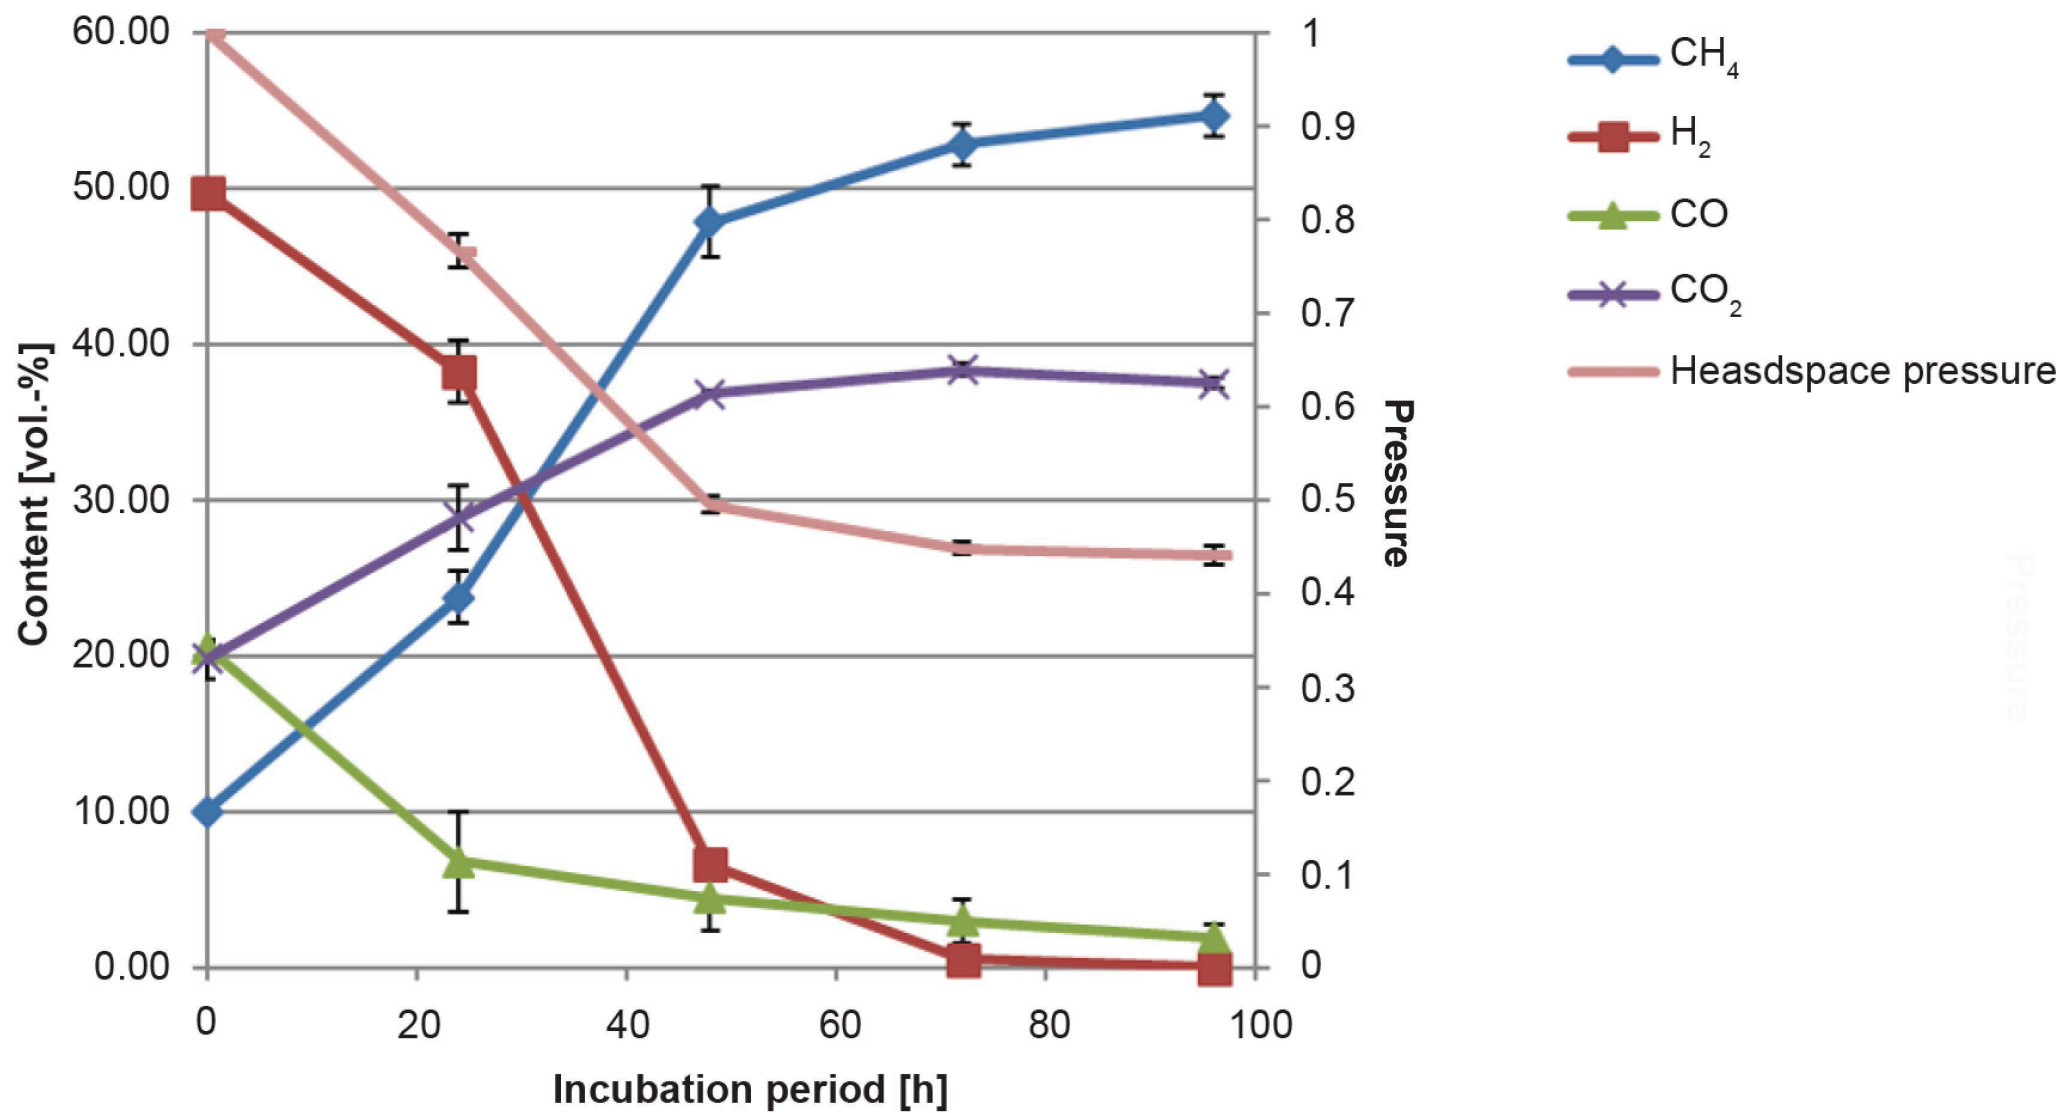

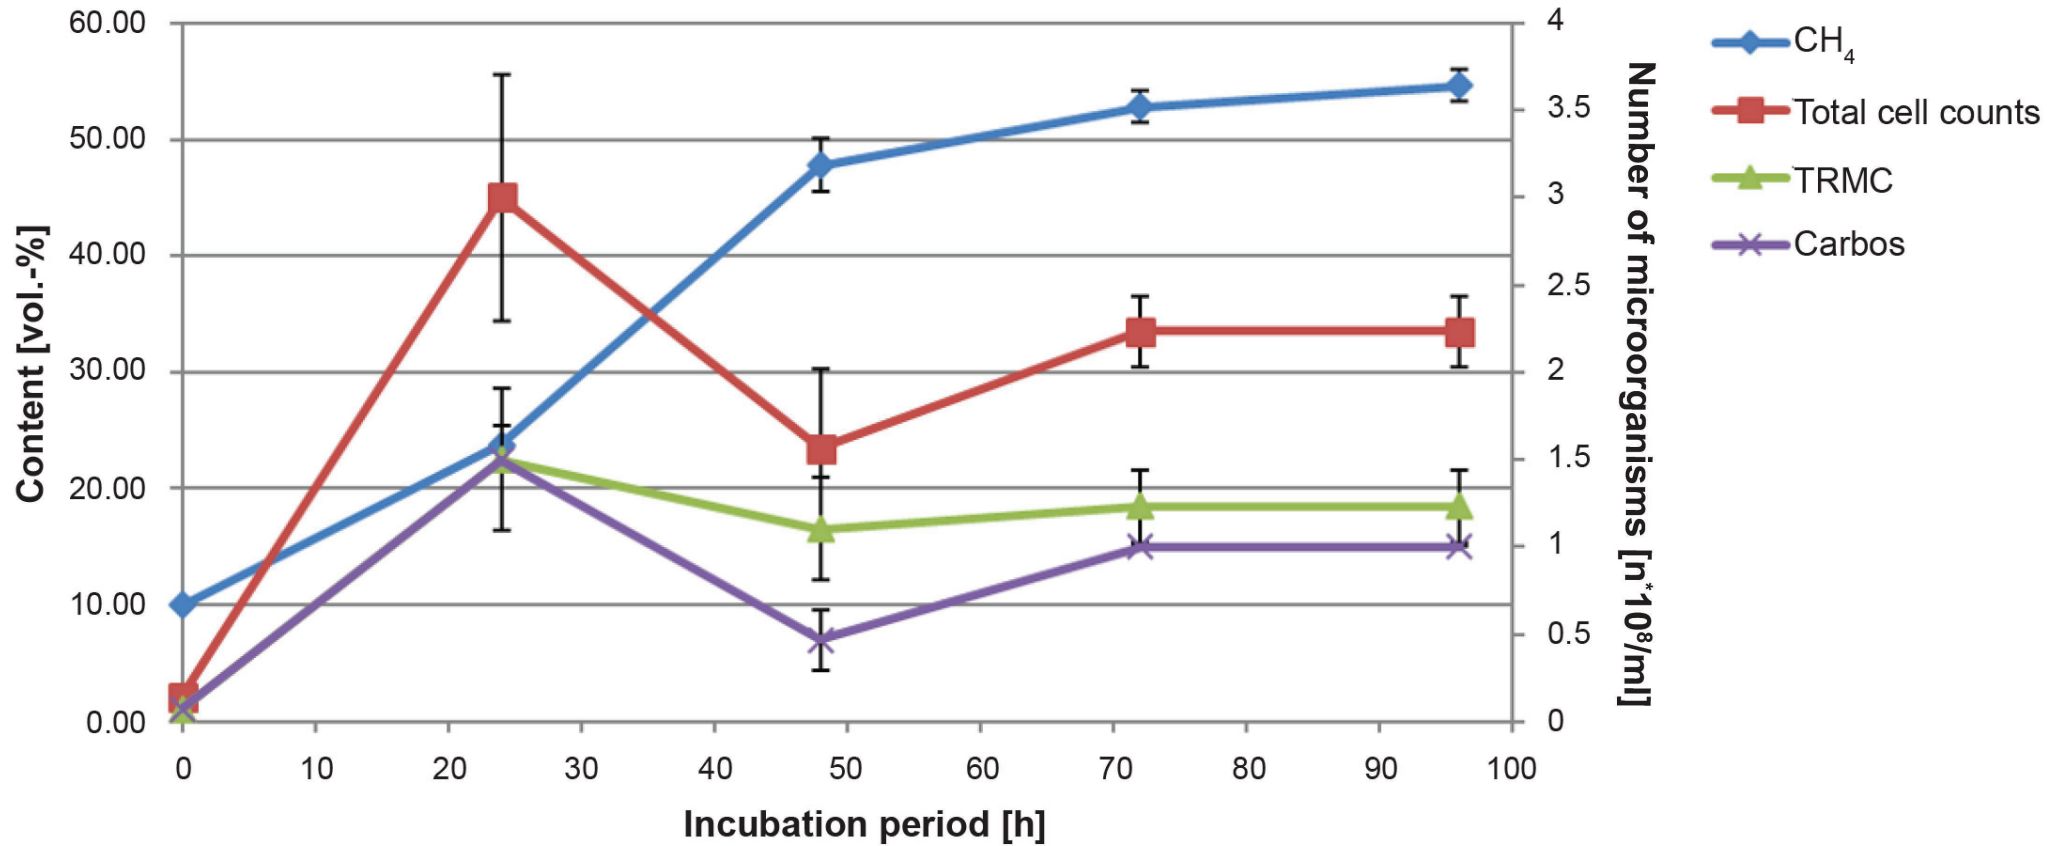

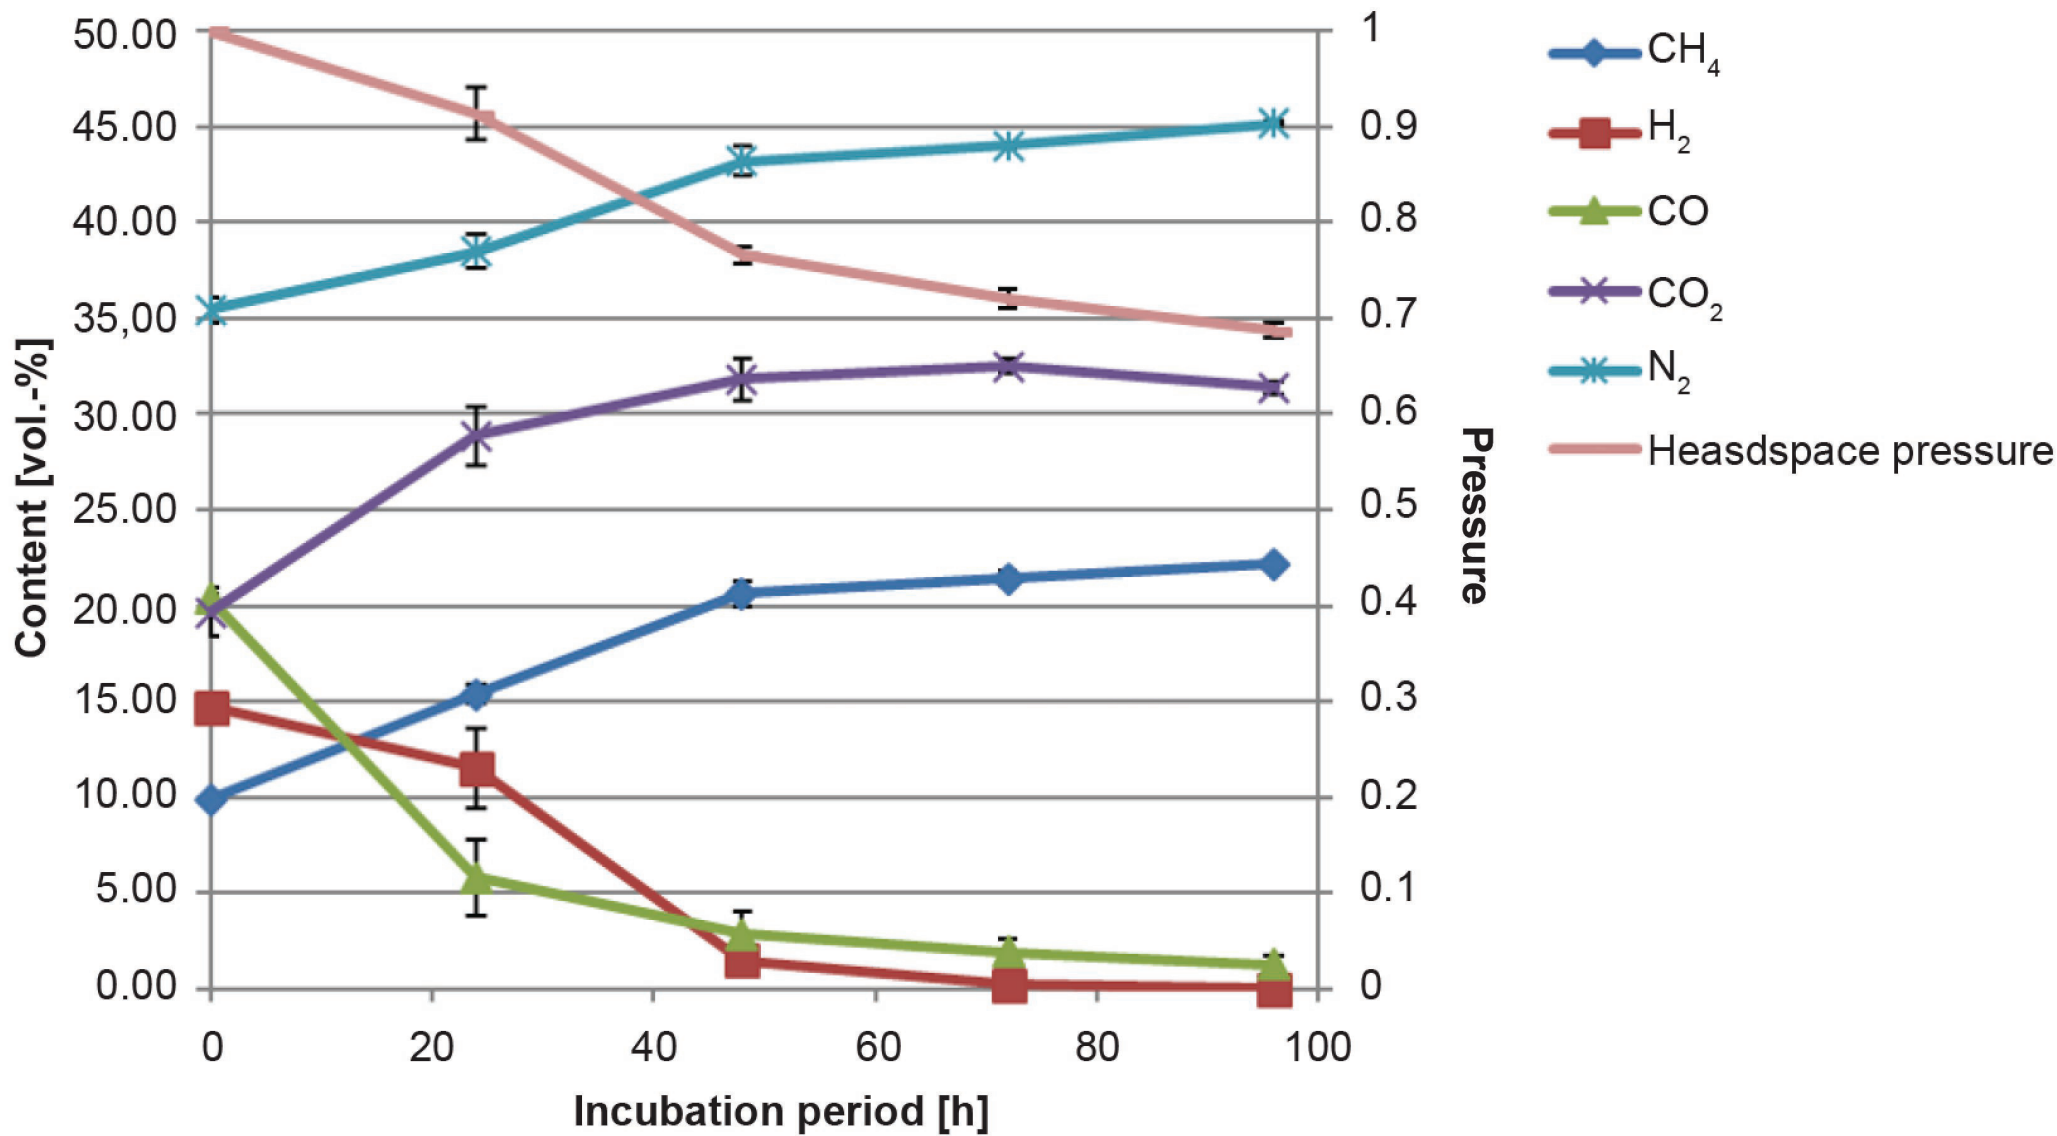

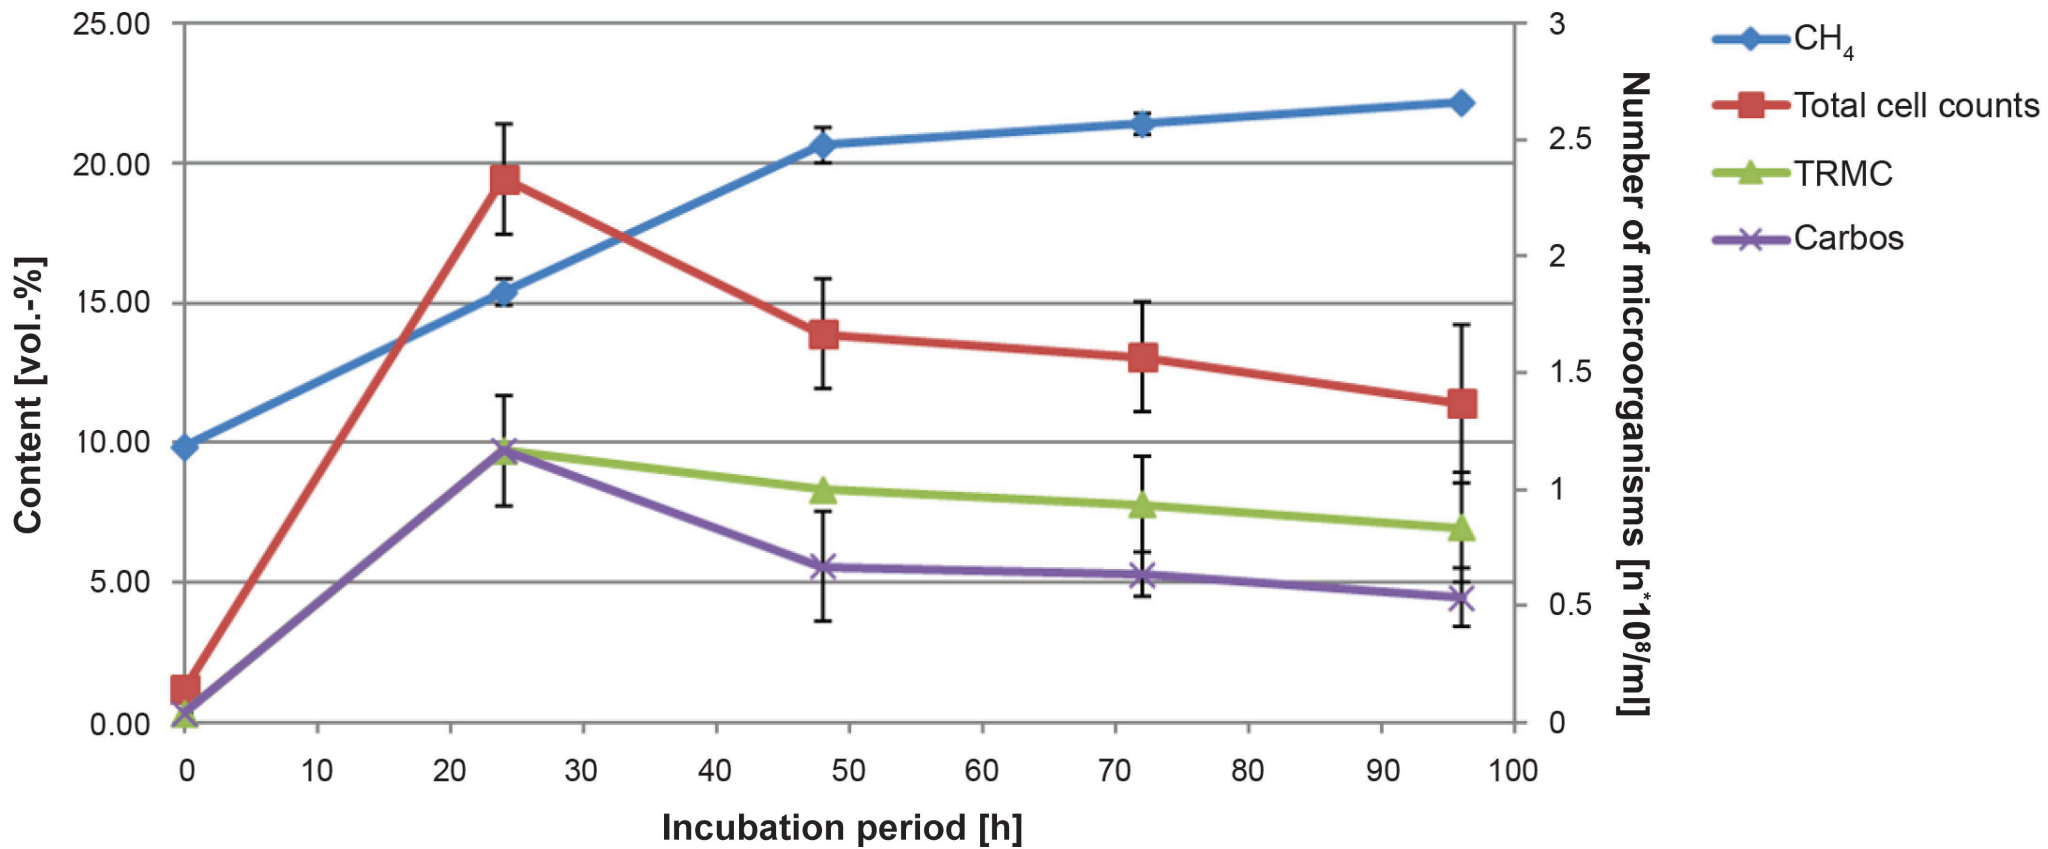

Source: http://biorxiv.org/content/10.1101/326561v1.full.pdf
